# Supplementary material
Source: PubMed Central journal article supplement (PMC7164767)
Supplement: mmc1.pdf [file mmc1.pdf]

## ***Journal of Dairy Science Interpretive Summary***

July 2004 (87:1806-1814)

**Influence of Pooled Colostrum or Colostrum Replacement on IgG.** *By Jones et al., page 1806.* Absorption of IgG from maternal colostrum or colostrum replacement was compared in newborn calves. Calves fed the two colostrum sources attained equivalent and adequate plasma IgG concentrations at 24 h. Colostrum replacement will enable producers to break disease transmission from cow to calf and to reduce illness and death preweaning. Use of animal plasma protein (an alternative to milk protein) in milk replacer also was studied. Calf growth and health were not affected by feeding animal plasma, indicating that plasma protein met calf nutrient requirements. Further study is required to investigate potential health benefits of animal plasma in milk replacer.
